# 1 **Improving Mortality Surveillance through Notification of Death at** 2 **Mbale Regional Referral Hospital, Uganda, October 2023–April 2024**

3 **Authors:** Innocent Ssemanda<sup>1\*</sup>, Edith Namulondo<sup>1</sup>, Carol Naziri<sup>1</sup>, Stephen Obbo<sup>2</sup>,  
4 Benon Kwesiga<sup>1</sup>, Richard Migisha<sup>1</sup>, Lilian Bulage<sup>1</sup>, Job Morukileng<sup>1</sup>, Alex Riolexus  
5 Ario<sup>1</sup>

6 **Institutional affiliations:** <sup>1</sup>Uganda Public Health Fellowship Program, Uganda  
7 National Institute of Public Health, Kampala, Uganda, <sup>2</sup>Mbale Regional Referral  
8 Hospital, Mbale, Uganda

9 **Correspondence\*:** Tel: +256702353037, Email: [issemanda@uniph.go.ug](mailto:issemanda@uniph.go.ug)

10

## 11 **Abstract**

### 12 **Background**

13 Accurate mortality reporting is crucial for monitoring population health, detecting  
14 disease outbreaks, and informing health policies. However, the implementation of  
15 medical certification of cause of death remains low in Uganda, with only 3.2% of  
16 health facility deaths being notified to the Ministry of Health. Using a quality  
17 improvement approach, we aimed to improve mortality reporting through medical  
18 certification of cause of death at Mbale Regional Referral Hospital (MRRH) in  
19 Uganda from 1% to 80% within 6 months.

### 20 **Methods**

21 We purposively selected MRRH as one of five regional referral hospitals with the  
22 lowest death notifications (0%-20%) during 2022 and 2023. We adopted the existing  
23 quality improvement team, which includes medical and non-medical personnel.  
24 Focus group discussions identified challenges that informed the root cause analysis.  
25 Using the Plan-Do-Study-Act (PDSA) cycle, we generated change ideas  
26 (interventions) to address these bottlenecks. We monitored the progress of the  
27 interventions with process indicators (number of mentorship sessions conducted,  
28 number of review meetings held) and an outcome indicator (proportion of deaths  
29 occurring in the hospital notified through the District Health Information System  
30 version 2 (DHIS2)) for 6 months. We tracked notifications monthly and analyzed the  
31 trend at six months using the Mann-Kendall test.

### 32 **Results**

33 We conducted 4/6 (67%) mentorship sessions and 7/19 (38%) review meetings and  
34 trained 32/50 (64%) nurses. The qualitative findings highlighted key challenges,  
35 including lack of knowledge and training, competing priorities and workload, resource  
36 constraints, undervaluing the importance of mortality reporting, failure to follow  
37 guidelines, and heavy workloads. The interventions included training and mentorship  
38 sessions for the staff on properly completing the death notification form, adopting a  
39 standardized process for form completion, and conducting bi-monthly review  
40 meetings. The proportion of deaths notified through DHIS2 from November 2023 to  
41 April 2024 increased from 17% to 65% (p=0.01).

NOTE: This preprint reports new research that has not been certified by peer review and should not be used to guide clinical practice.

42 **Conclusion**

43 Training of staff, adoption of a standard protocol on notification, and routine review  
44 meetings could facilitate death notification and improve mortality surveillance in  
45 Uganda enabling more accurate resource allocation for mortality prevention. The  
46 target was not met probably because all the staff were not trained, and the review  
47 meetings were sub-optimal.

48 **Keywords:** Mortality reporting, Medical Certification of Cause of Death, Quality  
49 improvement, Uganda

## 51 1.0 Background

52 Medical notification and certification of Cause of Death (MCCoD) involves authorized  
53 medical personnel determining and documenting the cause of death to maintain  
54 accurate mortality records. These records are essential for monitoring health indices,  
55 detecting disease outbreaks, assessing health interventions, and strengthening the  
56 civil registration and vital statistics (CRVS) system for informed health policy and  
57 planning [1, 2].

58 Death registration varies from close to 100% in the developed countries of Europe  
59 and America to around 50% in the Asia-Pacific region and less than 10% among  
60 African countries including Uganda [3]. In 2022, the World Bank estimated the crude  
61 mortality rate in Uganda to be at 6.4 per 1000 people [4]. This means Uganda  
62 registered more than 283,000 deaths in that year. About 159,996 (67%) of these  
63 deaths occurred in the communities and the other 93,654 (33%) occurred at the  
64 health facility. According to the District Health Information System 2 (DHIS2), only  
65 63,499 (69%) of the health facility deaths were captured and only 2,060 (3.2%) of  
66 these were notified to the Ministry of Health (MoH) with a valid MCCoD underlying  
67 cause.

68 With the use of MCCoD data, the World Health Organization (WHO), formulated  
69 guidelines for the International Classification of Disease (ICD), designed to promote  
70 international comparability in the collection, processing, classification, and  
71 presentation of morbidity and mortality data. These guidelines include a form for  
72 medical certification of cause of death which requires certifying physicians to  
73 record a pathophysiological sequence of clinical conditions leading to death, their  
74 durations, and other contributory causes [2, 5].

75 Of the deaths recorded in DHIS2, 34% (21,831) occurred in 21 public facilities,  
76 including 4 national referral hospitals and 17 regional referral hospitals. However,  
77 only 369 of these cases (1.2%) had a valid Medical Certification of Cause of Death  
78 (MCCoD). This indicates that most deaths in these health facilities are not properly  
79 documented or registered, leading to a significant loss of vital information about  
80 mortality causes and patterns in the region. Such gaps also undermine the quality of  
81 healthcare services and impact the effective allocation of resources.

82 A continuous quality improvement (CQI) approach can be an effective strategy for  
83 improving death notification compliance. Continuous Quality improvement is a  
84 progressive process of measurable improvement in the efficiency and effectiveness  
85 of performance outcomes in services or processes, to improve patient care. The CQI  
86 approach has been successfully used to improve performance practices in various  
87 settings. By employing a plan-do-study-act (PDSA) cycle, low-cost, high-impact  
88 interventions with continuous monitoring of mortality reporting can be applied  
89 iteratively in a clinical setting to improve mortality reporting. This iterative process  
90 allows for the development and testing of solutions, followed by evaluation and

91 refinement, ultimately leading to sustainable improvements in mortality reporting [6,  
92 7].

93 In Uganda, the Medical Notification and Certification of Cause of Death (MCCoD)  
94 was rolled out by the World Health Organization (WHO) in 2021. Two years later, in  
95 2023, the overall rate of death certification remains low at 11%. This underscores the  
96 need for improvement, which this project undertook through a continuous quality  
97 improvement approach. Mbale Regional Referral Hospital (MRRH) is the largest and  
98 the busiest hospital in the Bugisu subregion, Eastern Uganda, reporting up to 259  
99 deaths in DHIS2, yet its notification remains below 5%. This quality improvement  
100 project aimed to identify and analyze the factors associated with low death  
101 notification rates, address these factors, and highlight the successful implementation  
102 of improved death notification practices at MRRH.

103

## 104 **2.0 Methods**

### 105 **2.1 Quality improvement setting and design**

106 We conducted the project at MRRH, a government-owned and funded hospital. It is  
107 located 250km east of Kampala in the centre of Mbale City. The hospital serves over  
108 4.6 million people in 16 surrounding districts. Started in 1924 as a health Centre, it  
109 has since grown to a 450-bed capacity regional referral hospital [8]. The hospital has  
110 ample capacity to document death notifications since it requires only one nurse on  
111 duty to fill out the form following a patient's death.

112 We employed continuous quality improvement using a Plan-Do-Study-Act (PDSA)  
113 cycle where several challenges to death notification were identified and ranked, and  
114 solutions were proposed during the baseline assessment. The project was carried  
115 out in three phases i.e. baseline, intervention implementation for six months, and  
116 evaluation at the end.

117 Analysis of DHIS2 data a year before the project inception (September 2022 to  
118 August 2023), revealed that only 1% of the regional referral recorded deaths were  
119 being notified of about 200 deaths every month on average.

### 120 **2.2 Pre-intervention and inception**

121 We held an inception meeting with the Hospital Director and the heads of  
122 department of MRRH to introduce the project focus and identify resourceful persons.

### 123 **2.3 Formation and training of the Quality Improvement Team**

124 We held a meeting with the clinical and nursing staff and adopted an existing  
125 continuous quality improvement (CQI) team, adding a few members to coordinate  
126 the project activities. The existing CQI team was originally selected based on  
127 qualities such as enthusiasm, interest in improving quality, influence among co-  
128 workers, and ability to get things done.

129 We trained the team on the quality improvement processes and mortality  
130 surveillance to help them identify and prioritize problems, develop a clear aim  
131 statement, identify what to measure and change ideas and implement a series of  
132 PDSA cycles to develop and test the changes.

## 133 **2.4 Baseline assessment**

134 A baseline review was conducted to determine the status of the certified deaths in  
135 MRRH. Available data from the inpatient deaths reported and the notified death was  
136 extracted and analyzed. Self-administered questionnaires were also conducted to  
137 identify gaps that needed to be addressed. This information helped the CQI team to  
138 identify and prioritize key improvement areas.

## 139 **2.5 Problem identification**

140 The qualitative component of the study involved a focused group discussion with key  
141 stakeholders to understand the factors contributing to the low mortality reporting  
142 rates at MRRH. The interviews explored the perspectives and experiences of  
143 hospital staff in completing the HMIS 100 death notification form and the challenges  
144 they faced

145

### 146 **2.5.1 Problem prioritization**

147 The CQI team used a prioritization matrix for the three problems identified. Based on  
148 their experience, the team assigned points from 1-5 to each of the following  
149 prioritization aspects.

- 150 a) *Importance to the deceased's next of kin*: A score of 1 means the problem is  
151 not important, and a score of 5 means it is vitally important.
- 152 b) *Affordable in terms of time and resources*: A score of 1 means fixing the  
153 problem will take a lot of resources and time, and a score of 5 means it is very  
154 affordable and takes a reasonable time to fix.
- 155 c) *Easy to measure*: A score of 1 means the problem is not measurable, and a  
156 score of 5 means it is very easy to measure using existing tools.
- 157 d) *Under the control of the team*: A score of 1 means the problem is not under  
158 the team's control, and a score of 5 means it is entirely under the team's  
159 control.

160

## 161 **2.6 Setting the QI aims**

162 Based on the prioritization matrix, the team proposed to fill the HMIS form 100  
163 notification sections as soon as the death occurs. From the problem, we found an  
164 aim statement, specifically stating what we wanted to improve, who would benefit  
165 (the specific patient population), how much improvement we wanted, and by when  
166 (the timeline).

## 167 **2.7 Defining and describing the problem**

168 The mortality/death notification form (HMIS form 100) has 2 main sections. Section 1  
169 has two parts (1a and 1b), both capturing the demographics of the deceased.  
170 Section 2 is divided into frames. Frame A, having parts 1 and 2, captures medical  
171 data, and Frame B captures other medical data. Lastly, the form has a declaration  
172 section, where the medical practitioner certifying the death signs.

173 To notify, once death has occurred, the nurse must immediately complete Part 1a,  
174 part 1b, and Frame B of the HMIS 100. The Medical Records Officer (MRO) should  
175 get the deceased's file containing the HMIS 100 with the filled-in part 1a, part 1b, and  
176 Frame B. The MRO enters the information on Part 1a, part 1b, and Frame B into  
177 DHIS2. Once the information is entered into DHIS2, the MRO returns the filled HMIS  
178 form 100 to the ward for the Medical Doctor to certify the death, fill the sequence of  
179 cause of death in Frame A, and complete the other sections of the form.

## 180 **2.8 Aim statement**

181 The QI project aimed to increase the proportion of deaths occurring in the hospital  
182 that are notified through DHIS2 from 17% to 80% starting October 2023 through April  
183 2024.

## 184 **2.9 Root cause analysis**

185 We used a fishbone analysis technique to identify the reasons why the death  
186 notification form 100 is not filled immediately after death. The root causes were  
187 categorized as personnel, capacity, environment, monitoring, and  
188 guidelines/reminders.

## 189 **2.10 Intervention**

190 This phase involved developing and testing a set of interventions to address the  
191 factors identified in the baseline assessment. The interventions included four-day  
192 training sessions for the CQI team conducted by the principal investigator, two  
193 quarterly supervisory visits, and two Continuous Medical Education (CME) sessions.  
194 The teams were trained in quality improvement principles and processes, during  
195 which they identified factors affecting mortality certification and coding, selected  
196 those they could address, developed clear action plans, identified the quality  
197 improvement tools to use, and implemented a series of PDSA cycles to develop and  
198 test the solutions. The interventions were implemented simultaneously from the  
199 beginning of the project, and the PDSA framework was used to make minor  
200 adjustments as needed along the way.

201 The key aspects of this approach were measuring and monitoring performance  
202 outcomes, identifying and addressing gaps or inefficiencies, implementing targeted,  
203 evidence-based interventions, continuously evaluating and refining the interventions  
204 through the PDSA cycle, and maintaining a focus on improving patient care and  
205 outcomes.



206 Based on the root causes, the QI team used their experience to suggest related  
 207 changes to address the root causes and evaluated them using the PDSA cycle. The  
 208 proposed changes maintained the acceptable standards of service delivery as per  
 209 MoH guidelines. The team developed an implementation plan for the proposed  
 210 changes shown in Table 1.

211 **Table 1.** *Implementation plan (Plan-do-study-act) for the suggested changes to*  
 212 *address the root causes for failure to fill form 100 immediately after death at Mbale*  
 213 *Regional Referral Hospital, 2023-2024*

|              |                                            |                                                                                                                                                                                                                                                                                                                                                                               |
|--------------|--------------------------------------------|-------------------------------------------------------------------------------------------------------------------------------------------------------------------------------------------------------------------------------------------------------------------------------------------------------------------------------------------------------------------------------|
| <b>Plan</b>  | The proposed changes?                      | 1 Conducted a mentorship session for all nursing staff on the importance of filling out HMIS form 100 immediately after death<br>2 Developed a standardized process for filling HMIS form 100, including clear roles and responsibilities for each staff member<br>3 Ensured that all necessary supplies (e.g., MHIS form 100 booklets) are readily available in the hospital |
|              | Who was to make the changes?               | The QI team                                                                                                                                                                                                                                                                                                                                                                   |
|              | Where were the changes effected?           | All wards                                                                                                                                                                                                                                                                                                                                                                     |
|              | For how long were the changes tested?      | Two weeks                                                                                                                                                                                                                                                                                                                                                                     |
| <b>Do</b>    | After the above plan, we “do” the changes  | All nurses                                                                                                                                                                                                                                                                                                                                                                    |
| <b>Study</b> | What did we learn from the changes?        | There was an improvement in the assessment of filling HMIS form 100 as shown in DHIS2                                                                                                                                                                                                                                                                                         |
| <b>Act</b>   | After learning, from the changes, we acted | The changes were adopted                                                                                                                                                                                                                                                                                                                                                      |

214

## 215 **2.11 Sustaining changes**

216 The team sustained routine reviews of the deaths, mentorship of student nurses on  
 217 filling out HMIS form 100 following death on the ward, and left reminders at the  
 218 nurses’ workstation. We proposed to introduce the changes by making them the new  
 219 standard for service delivery during the project period and beyond and by sharing  
 220 results widely to influence practice nationally through advocacy as an additional way  
 221 to sustain changes.

## 222 **2.12 Intervention monitoring and evaluation**

223

224 We developed two process indicators and one outcome indicator from the sustained  
 225 changes and prioritized the problem. The progress of the process indicators was  
 226 tracked monthly while the outcome indicator was measured at the end of the six-  
 227 month project period. It involved measuring the change in MCCoD and mortality

228 reporting at MRRH. It involved collecting and analyzing quantitative data from  
229 DHIS2, hospital records, and death certificates. It also involved collecting and  
230 analyzing qualitative data from interviews with key stakeholders. The purpose of this  
231 phase was to evaluate the effectiveness and efficiency of the interventions in  
232 achieving the project objectives.

233

## 234 **3.0 Results**

### 235 **3.1 Pre-intervention and baseline assessment**

236 A team of 15 nurses and midwives was selected and trained in Continuous Quality  
237 Improvement (CQI), forming the CQI team. We appointed the Assistant Principal  
238 Nursing Officer to lead the project, coordinating meetings and serving as the liaison  
239 with the Principal Investigator. The composition of the QI team included ward in-  
240 charges, area managers from all departments, and at least one additional nursing  
241 staff member from each department.

242 At baseline, we found that a total of 141 deaths were reported in September 2023  
243 but only 13 had been notified giving a notification rate of 9%.

### 244 **3.2 Gaps identified during the baseline analysis**

245 Gaps identified during the baseline analysis revealed three major challenges:  
246 recurrent stockouts of the Notification form, inadequate knowledge of how to use the  
247 Notification and certification forms, and failure to fill the HMIS form 100 correctly as  
248 soon as the death occurs.

249

### 250 **3.3 Problem Prioritization results**

251 The prioritization results indicate that the most pressing issue is the failure to fill the  
252 HMIS form 100 correctly as soon as a death occurs, scoring 18 points. This is  
253 followed by inadequate knowledge of how to use the notification and certification  
254 forms, which received a score of 17. Lastly, recurrent stockouts of the notification  
255 forms (HMIS 100) were identified as a significant concern, with a total score of 15 as  
256 shown in Table 2.

257 *Table 2: Problem prioritization matrix for improving quality of Mortality notification at*  
258 *Mbale Regional Referral Hospital, 2022-2023*

| Problem | Important to the Next of keen (1-5) | Affordable in terms of time and resources (1-5) | Easy to measure (1-5) | Under the control of team members (1-5) | Total score |
|---------|-------------------------------------|-------------------------------------------------|-----------------------|-----------------------------------------|-------------|
|---------|-------------------------------------|-------------------------------------------------|-----------------------|-----------------------------------------|-------------|



|                                                                             |   |   |   |   |    |
|-----------------------------------------------------------------------------|---|---|---|---|----|
| Recurrent stockouts of the Notification forms (HMIS 100)                    | 3 | 3 | 5 | 4 | 15 |
| Inadequate knowledge of how to use the Notification and certification forms | 4 | 4 | 4 | 5 | 17 |
| Failure to fill the HMIS form 100 correctly as soon as the death occurs.    | 5 | 5 | 4 | 4 | 18 |

259

### 260 **3.4 Root cause findings**

261 The identified root causes included a lack of awareness among staff regarding the  
 262 importance of timely form completion, which can lead to delays. Additionally, there  
 263 was insufficient training on the procedures for completing the form, resulting in errors  
 264 or omissions. Resource constraints, such as limited access to necessary time or  
 265 personnel, further hindered prompt completion. Communication gaps among staff  
 266 members also contributed to misunderstandings about responsibilities related to the  
 267 form. Finally, broader systemic issues within the hospital exacerbated delays in filling  
 268 out the HMIS form as shown in Figure 1 below.

### 269 **3.5 Challenges in Completing HMIS Form 100**

270 The group discussions revealed several key challenges that hindered the timely and  
 271 accurate completion of the HMIS 100 death notification form, here we report direct  
 272 quotes from the key stakeholders:

#### 273 *Lack of Knowledge and Training*

274 Many nursing staff expressed a lack of understanding of how to properly fill out the  
 275 various sections of the HMIS Form 100. They reported receiving limited training on  
 276 the purpose and process of mortality reporting, leading to confusion and errors when  
 277 attempting to complete the forms.

278 "I've never been trained to use the HMIS form 100. I'm unsure what information I  
 279 should fill out and where. It's all very confusing."- Nurse, Mbale RRH

#### 280 *Competing Priorities and Workload*

281 The nursing staff often cited their heavy workload and competing priorities as  
 282 barriers to completing the HMIS Form 100 immediately after a patient's death. The

283 demands of providing direct patient care took precedence, leaving little time to focus  
284 on administrative tasks like mortality reporting.

285 "After a patient passes away, there are so many other urgent things I need to take  
286 care of. Filling out that form just gets pushed to the side because I'm busy with other  
287 patients." - A Nurse, Mbale RRH

### 288 *Lack of Supplies and Resources*

289 Intermittent stockouts of the HMIS Form 100s were reported as a significant  
290 challenge, with nurses often unable to access the necessary forms when needed.  
291 This disrupted the mortality reporting process and contributed to underreporting.

292 "Sometimes we run out of the HMIS form 100, and then we can't fill them out when a  
293 patient dies. We must wait until new forms arrive, and by then it's too late."- Nursing  
294 Supervisor, Mbale RRH

### 295 *Importance of Mortality Reporting Undervalued*

296 Several respondents indicated that the importance of accurate and timely mortality  
297 reporting was not well understood or prioritized by hospital management and staff.  
298 This lack of perceived value undermined the motivation to ensure proper completion  
299 of the HMIS form 100.

300 "I don't think the hospital leadership sees the value in this mortality reporting. They  
301 don't emphasize it or hold us accountable for doing it properly."- A Medical Records  
302 Officer, Mbale RRH

303 In summary, the qualitative findings highlighted the multifaceted challenges faced by  
304 hospital staff in completing the HMIS 100 death notification form, including  
305 knowledge gaps, workload pressures, resource constraints, and a lack of perceived  
306 importance of mortality reporting.

## 307 **3.6 Monitoring Results**

308 The monitoring results for increasing the number of HMIS form 100 filled immediately  
309 after death at Mbale Regional Referral Hospital from October 2023 to April 2024  
310 show that 67% of the target for mentorship sessions was achieved, with 4 out of the  
311 planned 6 sessions conducted. In terms of review meetings, only 58% of the target  
312 was met, with 7 out of 12 planned meetings held. Regarding the output indicator, 32  
313 nurses were mentored on filling the HMIS form 100, representing 57% of the target  
314 of 15 nurses per session. Finally, the outcome indicator revealed that 65% of deaths  
315 were notified immediately using HMIS 100, falling short of the 80% target. As shown  
316 in the table 3 below.

317 *Table 3. Indicator monitoring matrix for the progress towards increasing the number*  
 318 *of HMIS form 100 filled immediately after death at Mbale RRH, between October*  
 319 *2023 to April 2024.*

| <b>Input indicators</b>                                                                           | <b>Target</b>                                            | <b>Data source</b>                        | <b>Achieved</b> |
|---------------------------------------------------------------------------------------------------|----------------------------------------------------------|-------------------------------------------|-----------------|
| 1. Number of mentorship sessions conducted among the nurses on filling HMIS form 100              | One session every month (6 sessions)                     | Attendance sheets and the session minutes | 4 (67%)         |
| 2. Number of review meetings on filling of HMIS form 100 during bi-weekly QI meetings             | Two review meetings per month for 6 months (12 meetings) | Attendance sheets and the session minutes | 7 (58%)         |
| <b>Output indicators</b>                                                                          |                                                          |                                           |                 |
| 1. Number of nurses mentored on filing HMIS form 100.                                             | 15 nurses per mentorship                                 | Attendance sheets                         | 32 (57%)        |
| <b>Outcome indicator</b>                                                                          |                                                          |                                           |                 |
| The proportion of deaths immediately notified using HMIS 100 between September 2023 to April 2024 | 80% of deaths notified immediately after death           | Daily morning review meeting notes.       | 65%             |

320  
 321 Following the mentorships and documentation reviews, the proportion of deaths  
 322 notified in DHIS2 significantly increased from 18% in September 2023 to 65% in April  
 323 2024 (p=0.009) as shown in Figure 2 below.

324  
 325 **4.0 Discussion**

326 This quality improvement project aimed to increase the proportion of deaths  
 327 occurring at Mbale Regional Referral Hospital that are notified through the DHIS2  
 328 system, from a baseline of 17% to a target of 80% over a 6-month period. The key  
 329 interventions implemented included conducting staff mentorship sessions on  
 330 properly completing the HMIS 100 death notification form, developing a standardized  
 331 process for form completion, and ensuring the availability of necessary supplies and  
 332 the results demonstrate a significant improvement in the proportion of deaths  
 333 notified, increasing from 18% at baseline to 65% by the end of the project period.  
 334 The implementation of targeted interventions, such as the staff mentorship sessions  
 335 and the development of a standardized process, helped to address some of these  
 336 challenges. By equipping the nursing staff with the knowledge and tools to accurately  
 337 complete the HMIS form 100, and by integrating mortality reporting into the hospital's  
 338 routine practices, the project was able to drive notable improvements in notification  
 339 rates.

340

341 This progress, while still below the 80% target, marks a significant step forward in  
342 enhancing mortality reporting at the hospital following the staff training . A study  
343 done in US found that training staff on using a system in death notification positively  
344 impacts their ability to report on death [9]. However, this suggests that additional,  
345 more sustained efforts may be required to fully overcome the deeply entrenched  
346 barriers to effective mortality reporting. Continued investment in staff training [10],  
347 the consistent availability of necessary supplies, and the ongoing reinforcement of  
348 the importance of mortality reporting by hospital leadership will be crucial to  
349 maintaining and further enhancing the progress made. One study done in South  
350 Africa found that such continued efforts also minimize the number of errors that can  
351 be found in the notification reports [11].

352 The qualitative findings provided insights into the factors that have historically  
353 hindered effective mortality reporting at the hospital. Consistent with our findings, a  
354 study conducted in New York identified negative attitudes and a lack of knowledge  
355 among emergency department staff as major limitations to death notification [12].  
356 Similarly, in our work in Mbale, we analyzed potential root causes, allowing the team  
357 to develop a multi-pronged systemic approach to address the issue and formulate  
358 potential solutions. Other studies have shown that such comprehensive approaches  
359 can lead to significant improvements [13, 14].

360 Furthermore, the lessons learned from this project—such as identifying knowledge  
361 gaps and addressing attitudes—could have broader implications for enhancing  
362 mortality reporting across Uganda's healthcare system. The interventions  
363 implemented, including training sessions and integrating mortality reviews into  
364 routine nurses' meetings, could serve as a model for adaptation and replication by  
365 other regional referral hospitals, ultimately contributing to the strengthening of the  
366 country's civil registration and vital statistics (CRVS) system.

## 367 **5.0 Study limitations**

368 The quality improvement project was carried out over a relatively short 6-month  
369 period. While this timeframe allowed for the implementation and initial evaluation of  
370 the interventions, a longer study duration would have provided more time to fully  
371 embed the changes and assess their long-term sustainability. The short project  
372 period may have limited the ability to achieve the full 80% target for mortality  
373 notification.

374 The project was implemented solely at Mbale Regional Referral Hospital, which  
375 limits the generalizability of the findings to other healthcare facilities in Uganda.  
376 Factors specific to the context of Mbale RRH, such as resources, staffing, and  
377 organizational culture, may have influenced the success of the interventions.  
378 Expanding the project to multiple regional referral hospitals could provide broader  
379 insights into the challenges and solutions for improving mortality reporting.

380 The qualitative data collected through stakeholder interviews relied on self-reported  
381 experiences and perceptions of the hospital staff. While this provided valuable  
382 insights into the barriers to mortality reporting, self-reported data can be subject to  
383 social desirability bias and may not fully capture the complexity of the issues.  
384 Incorporating additional observational data or document reviews could have  
385 strengthened the analysis.

## 386 **6.0 Conclusions**

387 The quality improvement project at Mbale Regional Referral Hospital successfully  
388 increased mortality reporting through the HMIS 100 death notification form from a  
389 baseline of 18% to 65% over a 6-month period, highlighting the effectiveness of  
390 targeted interventions in addressing the multifaceted barriers to effective mortality  
391 reporting, including gaps in staff knowledge and training, competing priorities and  
392 heavy workloads, resource constraints, and the perceived lack of importance placed  
393 on this critical data collection process.

## 394 **List of abbreviations**

395 MCoD - Medical Notification and Certification of Cause of Death; CRVS - Civil  
396 Registration and Vital Statistics; MoH – Ministry of Health; NSSF - National Social  
397 Security Fund; DHIS2 - District Health Information System version 2; WHO - World  
398 Health Organization; ICD - International Classification of Disease; CQI - Continuous  
399 Quality Improvement; PDSA - Plan-Do-Study-Act; HMIS - Health Management  
400 Information System; MRRH - Mbale Regional Referral Hospital; QI - Quality  
401 Improvement; CME - Continuous Medical Education

## 402 **Declarations**

### 403 **Ethics approval and consent to participate**

404 A non-research determination form was submitted to the US CDC for clearance  
405 before the commencement of the study. The Office of the Associate Director for  
406 Science, U.S. Centers for Disease Control and Prevention approved the study as a  
407 non-research project. This activity was reviewed by CDC and was conducted  
408 consistent with applicable federal law and CDC policy. §§See e.g., 45 C.F.R. part 46,  
409 21 C.F.R. part 56; 42 U.S.C. §241(d); 5 U.S.C. §552a; 44 U.S.C. §3501 et seq. The  
410 study used data without capturing unique identifiers of the deceased with permission  
411 from the Ministry of Health and Mbale Regional Referral Hospital.

### 412 **Availability of data and materials**

413 The datasets upon which our findings are based belong to the Uganda Public Health  
414 Fellowship Program. For confidentiality reasons, the datasets are not publicly  
415 available. However, the data can be made available upon reasonable request from  
416 the corresponding author (Innocent Ssemanda, Email: [issemanda@uniph.go.ug](mailto:issemanda@uniph.go.ug))  
417 with permission from the Uganda Public Health Fellowship Program.

### 418 **Conflict of interest**

419 The authors declare that they had no conflict of interest.

#### 420 **Funding and disclaimer**

421 This study was supported by the President’s Emergency Plan for AIDS Relief  
422 (PEPFAR) through the United States Centers for Disease Control and Prevention  
423 Cooperative Agreement number GH001353-01 through Makerere University School  
424 of Public Health to the Uganda Public Health Fellowship Program, Ministry of Health.  
425 The contents of this manuscript are solely the responsibility of the authors and do not  
426 necessarily represent the official views of the US Centers for Disease Control and  
427 Prevention and the Department of Health and Human Services, Makerere University  
428 School of Public Health, or the Uganda Ministry of Health.

#### 429 **Authors’ contributions**

430 IS: participated in the conception, investigation, design, analysis, and interpretation  
431 of the study and wrote the draft manuscript; ED and CN participated in the  
432 development of the concept and review of the results; JM supervised the project  
433 implementation and participated in the development of the concept and review of the  
434 results; BK and LB reviewed the report, reviewed the drafts of the manuscript for  
435 intellectual content and made multiple edits to the draft article; SO reviewed the  
436 report and ensured data accuracy; RM, LB and ARA reviewed the final manuscript to  
437 ensure intellectual content and scientific integrity. All authors read and approved the  
438 final bulletin.

#### 439 **Acknowledgments**

440 The authors would like to thank the Ministry of Health and the Mbale Regional  
441 Referral Hospital administration for their permission and support in accessing the  
442 hospital premises, staff, and data utilized in this project. We would also like to thank  
443 the staff at the Uganda National Institute of Public Health for their technical  
444 assistance.

445

446



## 447 References

448

- 449 1. Mikkelsen, L., et al., *A global assessment of civil registration and vital statistics systems: monitoring data quality and progress*. The Lancet, 2015. **386**(10001): p. 1395-1406.
- 450
- 451 2. WHO. *ICD-11 Fact Sheet*. 2022 [cited 2024 16th May ]; Available from:  
452 <https://www.who.int/publications/m/item/icd-11-fact-sheet>.
- 453 3. Mathers, C.D., et al., *Counting the dead and what they died from: an assessment of the global status of cause of death data*. Bulletin of the world health organization, 2005. **83**: p. 171-177c.
- 454
- 455
- 456 4. Bank, T.W. *Death rate, crude (per 1,000 people), Fact Sheet*. 2022 [cited 2024 16th May]; Available from: <https://data.worldbank.org/indicator/SP.DYN.CDRT.IN>.
- 457
- 458 5. Rao, C. and M. Gupta, *The civil registration system is a potentially viable data source for reliable subnational mortality measurement in India*. BMJ global health, 2020. **5**(8): p. e002586.
- 459
- 460
- 461 6. Moen, R. *Foundation and History of the PDSA Cycle*. in *Asian network for quality conference*. Tokyo. [https://www.deming.org/sites/default/files/pdf/2015/PDSA\\_History\\_Ron\\_Moen.Pdf](https://www.deming.org/sites/default/files/pdf/2015/PDSA_History_Ron_Moen.Pdf). 2009.
- 462
- 463
- 464 7. Christoff, P., *Running PDSA cycles*. Current problems in pediatric and adolescent health care, 2018. **48**(8): p. 198-201.
- 465
- 466 8. RRH, M. *Mbale Regional Referral Hospital*. 2023 [cited 2024 16th May]; Available from: <https://mbalehospital.go.ug/>.
- 467
- 468 9. Hobgood, C., et al., *The educational intervention "GRIEV\_ING" improves the death notification skills of residents*. Academic Emergency Medicine, 2005. **12**(4): p. 296-301.
- 469
- 470 10. Ponce, A., et al., *Death notification training for prehospital providers: a pilot study*. Prehospital Emergency Care, 2010. **14**(4): p. 537-542.
- 471
- 472 11. Burger, E.H., L. Van der Merwe, and J. Volmink, *Errors in the completion of the death notification form*. South African Medical Journal, 2007. **97**(11): p. 1077-1081.
- 473
- 474 12. Akkas, M. and M.C. Demir. *Barriers to brain death notifications from emergency departments*. in *Transplantation proceedings*. 2019. Elsevier.
- 475
- 476 13. Barbieri, J.S., et al., *The mortality review committee: a novel and scalable approach to reducing inpatient mortality*. The Joint Commission journal on quality and patient safety, 2013. **39**(9): p. 387-AP9.
- 477
- 478
- 479 14. Borzecki, A.M., et al., *How valid is the AHRQ patient safety indicator "postoperative physiologic and metabolic derangement"?* Journal of the American College of Surgeons, 2011. **212**(6): p. 968-976. e2.
- 480
- 481



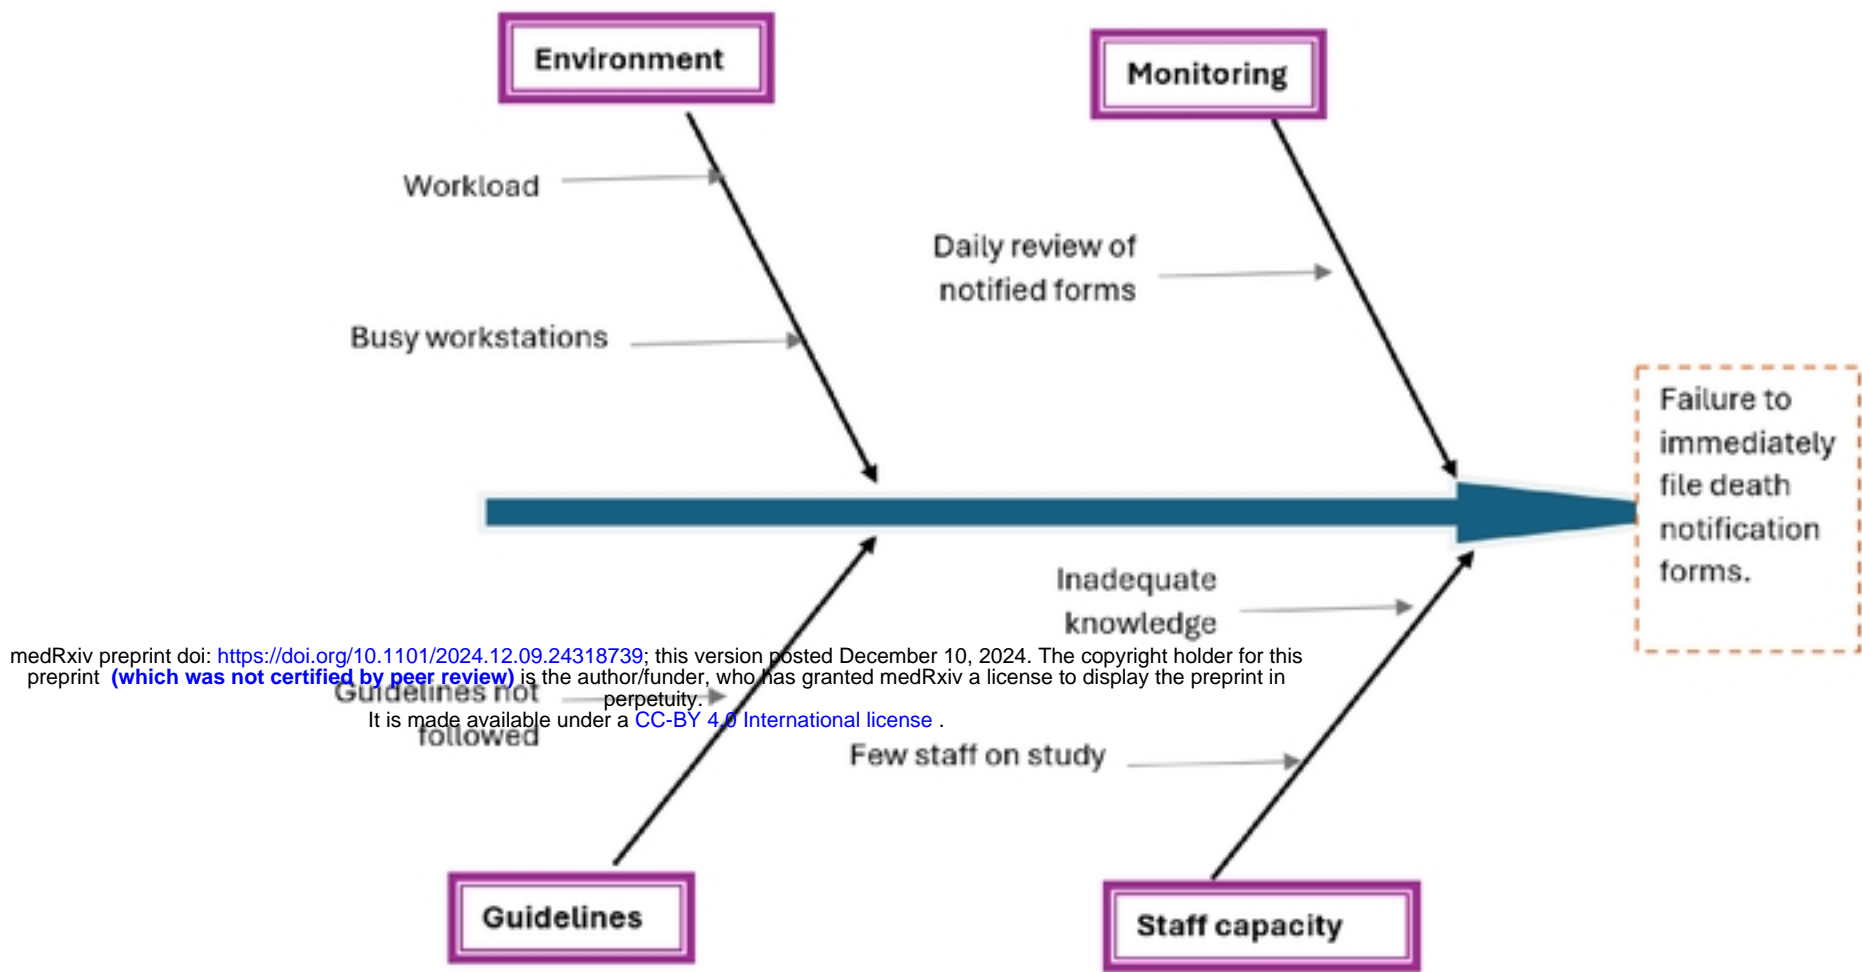

medRxiv preprint doi: <https://doi.org/10.1101/2024.12.09.24318739>; this version posted December 10, 2024. The copyright holder for this preprint (which was not certified by peer review) is the author/funder, who has granted medRxiv a license to display the preprint in perpetuity. It is made available under a [CC-BY 4.0 International license](https://creativecommons.org/licenses/by/4.0/).

**Figure 1: Root causes for failure of immediate filling of HIMIS form 100, Mbale RRH, 2023–2024**

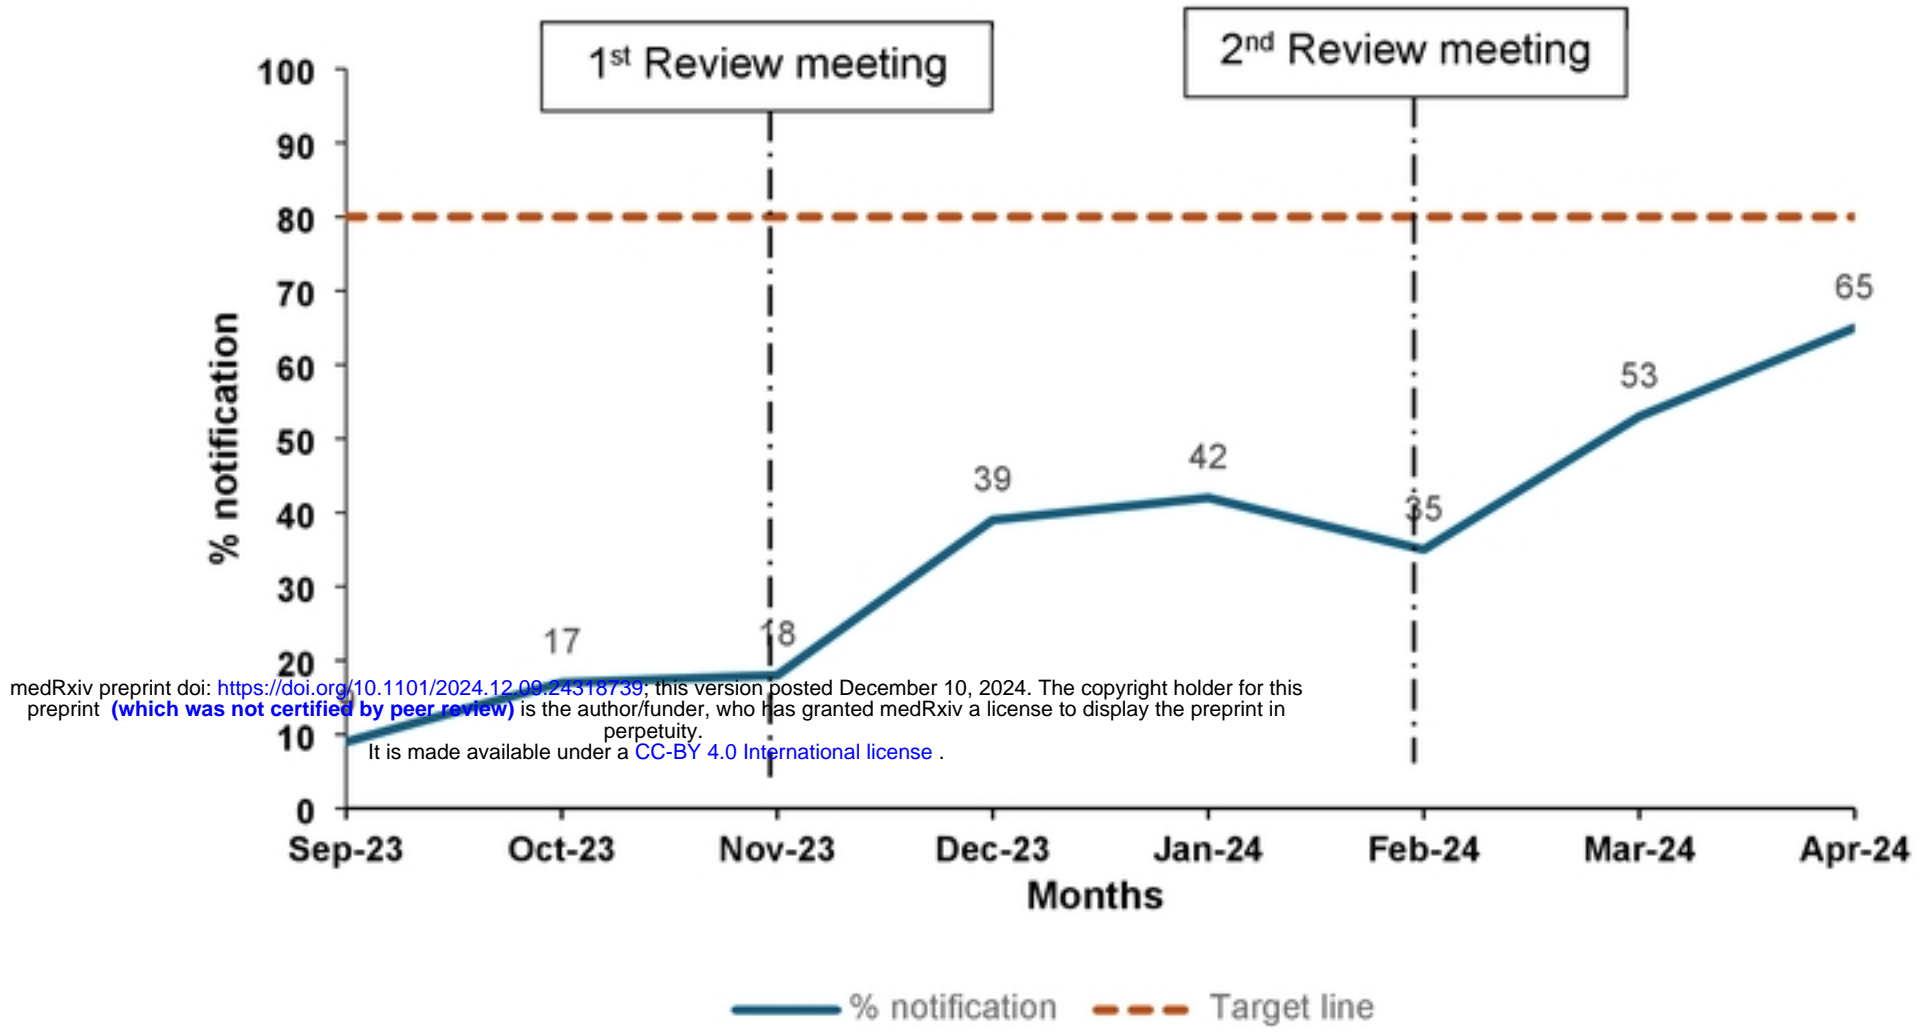

**Figure 2: The trend of mortality notification from September 2023 to April 2024, DHIS2, Mbale Regional Referral Hospital**
